# Supplementary material for: Health‐Related Quality of Life in Patients with Breast Cancer in Latin America and the Caribbean: A Systematic Review and Meta‐Analysis
Source: PubMed Central journal article supplement — Oncologist. 2021 Feb 25;26(5):e794–806. doi: 10.1002/onco.13709 (PMC8100549; doi:10.1002/onco.13709), 2021-02-25
Supplement: ONCO-26-e794-s001.pdf [file ONCO-26-e794-s001.pdf]

Supplemental Tables for:  
Health related quality of life in breast cancer patients in Latin America and the Caribbean: a systematic review and meta-analysis  
Lucas Angel Damian Gonzalez et al.

S1. Search strategy for literature review used and date of its implementation.

- **PUBMED (14-08-2018)**

| Search | Query                                                                                                                                                                                                                                                                                                                                                                                                                                                                                                                                                                                                                                                                                                                                                                                                                                                                                                                                                                                                                                                                                                                                                                                                                                                                                                                                                                                                                                                                                          | Items found |
|--------|------------------------------------------------------------------------------------------------------------------------------------------------------------------------------------------------------------------------------------------------------------------------------------------------------------------------------------------------------------------------------------------------------------------------------------------------------------------------------------------------------------------------------------------------------------------------------------------------------------------------------------------------------------------------------------------------------------------------------------------------------------------------------------------------------------------------------------------------------------------------------------------------------------------------------------------------------------------------------------------------------------------------------------------------------------------------------------------------------------------------------------------------------------------------------------------------------------------------------------------------------------------------------------------------------------------------------------------------------------------------------------------------------------------------------------------------------------------------------------------------|-------------|
| #85    | Search (#69 AND #82 AND #83) Filters: Publication date from 2003/01/01                                                                                                                                                                                                                                                                                                                                                                                                                                                                                                                                                                                                                                                                                                                                                                                                                                                                                                                                                                                                                                                                                                                                                                                                                                                                                                                                                                                                                         | 1377        |
| #84    | Search (#69 AND #82 AND #83)                                                                                                                                                                                                                                                                                                                                                                                                                                                                                                                                                                                                                                                                                                                                                                                                                                                                                                                                                                                                                                                                                                                                                                                                                                                                                                                                                                                                                                                                   | 1732        |
| #83    | Search (Americas[MeSH Terms:noexp] OR America*[tiab] OR Latin America[Mesh] OR Latin America*[tiab] OR Latinamerica*[tiab] OR Latinoamerica*[tiab] OR Latin*[tiab] OR Hispanic Americans[Mesh] OR Hispanic America*[tiab] OR Hispanoamerica*[tiab] OR Iberoamerica*[tiab] OR Ibero Americ*[tiab] OR Panamerican*[tiab] OR Central America[Mesh] OR Central America*[tiab] OR Centroamerica*[tiab] OR Mesoamerica*[tiab] OR Meso America*[tiab] OR Middle America*[tiab] OR South America[Mesh] OR South America*[tiab] OR Southamerica*[tiab] OR Sudamerica*[tiab] OR "America del sur"[tiab] OR Caribbean Region[Mesh] OR Caribbean[tiab] OR Caribe*[tiab] OR West Indies[Mesh] OR West Indi*[tiab] OR Antill*[tiab] OR Indians, South American[Mesh] OR Indians, Central American[Mesh] OR Amerindian*[tiab] OR Indians[tiab] OR American Indian*[tiab] OR Native America*[tiab] OR Patagoni*[tiab] OR Andes[tiab] OR Andean*[tiab] OR Amazon*[tiab] OR Argentin*[ad] OR Argentin*[tiab] OR Argentina[pl] OR Bolivia*[ad] OR Bolivia*[tiab] OR Bolivia[pl] OR Brazil*[ad] OR Brasil*[ad] OR Brazil*[tiab] OR Brasil*[tiab] OR Brazil[pl] OR Colombia*[ad] OR Colombia*[tiab] OR Colombia[pl] OR Chile*[ad] OR Chile*[tiab] OR Chile[pl] OR Ecuador*[ad] OR Ecuador*[ad] OR Ecuador*[tiab] OR Ecuador[pl] OR Guiana*[ad] OR Guiana*[tiab] OR French Guiana[pl] OR Guyan*[ad] OR Guyan*[tiab] OR Guyana[pl] OR Paraguay*[ad] OR Paraguay*[tiab] OR Paraguay[pl] OR Peru*[ad] OR Peru*[tiab] OR | 1298120     |

| Search | Query                                                                                                                                                                                                                                                                                                                                                                                                                                                                                                                                                                                                                                                                                                                                                                                                                                                                                                                                              | Items found |
|--------|----------------------------------------------------------------------------------------------------------------------------------------------------------------------------------------------------------------------------------------------------------------------------------------------------------------------------------------------------------------------------------------------------------------------------------------------------------------------------------------------------------------------------------------------------------------------------------------------------------------------------------------------------------------------------------------------------------------------------------------------------------------------------------------------------------------------------------------------------------------------------------------------------------------------------------------------------|-------------|
|        | Peru[pl] OR Surinam*[ad] OR Surinam*[tiab] OR Suriname[pl] OR Uruguay*[ad] OR Uruguay*[tiab] OR Uruguay[pl] OR Venez*[ad] OR Venez*[tiab] OR Venezuela[pl] OR Belize*[ad] OR Belize*[tiab] OR Belize[pl] OR Costa Ric*[ad] OR Costarric*[ad] OR Costaric*[ad] OR Costa Ric*[tiab] OR Costarric*[tiab] OR Costaric*[tiab] OR Costa Rica[pl] OR Salvador*[ad] OR Salvador*[tiab] OR El Salvador[pl] OR Guatemal*[ad] OR Guatemal*[tiab] OR Guatemala[pl] OR Hondur*[ad] OR Hondur*[tiab] OR Honduras[pl] OR Nicaragu*[ad] OR Nicaragu*[tiab] OR Nicaragua[pl] OR Panam*[ad] OR Panam*[tiab] OR Panama[pl] OR Mexico[Mesh] OR Mexic*[ad] OR Mexic*[tiab] OR Mejjc*[tiab] OR Mexico[pl] OR Cuba*[ad] OR Cuba*[tiab] OR Cuba[pl] OR OR Dominic*[ad] OR Dominic*[tiab] OR Dominican Republic[pl] OR Haiti*[ad] OR Haiti*[tiab] OR Haiti[pl] OR Jamaic*[ad] OR Jamaic*[tiab] OR Jamaica[pl] OR Puerto Ric*[tiab] OR Puertoric*[tiab] OR Puertoric*[tiab]) |             |
| #82    | Search (#70 OR #71 OR #72 OR #73 OR #74 OR #75 OR #76 OR #77 OR #78 OR #79 OR #80 OR #81)                                                                                                                                                                                                                                                                                                                                                                                                                                                                                                                                                                                                                                                                                                                                                                                                                                                          | 349456      |
| #81    | Search Breast Malignan*[tiab]                                                                                                                                                                                                                                                                                                                                                                                                                                                                                                                                                                                                                                                                                                                                                                                                                                                                                                                      | 1093        |
| #80    | Search Breast Neoplas*[tiab]                                                                                                                                                                                                                                                                                                                                                                                                                                                                                                                                                                                                                                                                                                                                                                                                                                                                                                                       | 9327        |
| #79    | Search Breast Carcinom*[tiab]                                                                                                                                                                                                                                                                                                                                                                                                                                                                                                                                                                                                                                                                                                                                                                                                                                                                                                                      | 28709       |
| #78    | Search Breast Cancer[tiab]                                                                                                                                                                                                                                                                                                                                                                                                                                                                                                                                                                                                                                                                                                                                                                                                                                                                                                                         | 238494      |
| #77    | Search Breast Tumors[tiab]                                                                                                                                                                                                                                                                                                                                                                                                                                                                                                                                                                                                                                                                                                                                                                                                                                                                                                                         | 10345       |
| #76    | Search Breast Tumor[tiab]                                                                                                                                                                                                                                                                                                                                                                                                                                                                                                                                                                                                                                                                                                                                                                                                                                                                                                                          | 8769        |
| #75    | Search Mammary Carcinom*[tiab]                                                                                                                                                                                                                                                                                                                                                                                                                                                                                                                                                                                                                                                                                                                                                                                                                                                                                                                     | 7973        |

| Search | Query                                                                                                                                                                                                                                                                                                                                                                                                                                                                                    | Items found |
|--------|------------------------------------------------------------------------------------------------------------------------------------------------------------------------------------------------------------------------------------------------------------------------------------------------------------------------------------------------------------------------------------------------------------------------------------------------------------------------------------------|-------------|
| #74    | Search Mammary Tumors[tiab]                                                                                                                                                                                                                                                                                                                                                                                                                                                              | 5646        |
| #73    | Search Mammary Tumor[tiab]                                                                                                                                                                                                                                                                                                                                                                                                                                                               | 7956        |
| #72    | Search Mammary Cancer[tiab]                                                                                                                                                                                                                                                                                                                                                                                                                                                              | 3006        |
| #71    | Search Mammary Neoplas*[tiab]                                                                                                                                                                                                                                                                                                                                                                                                                                                            | 885         |
| #70    | Search Breast Neoplasms[Mesh]                                                                                                                                                                                                                                                                                                                                                                                                                                                            | 266019      |
| #69    | Search (#1 OR #2 OR #3 OR #4 OR #5 OR #6 OR #7 OR #8 OR #9 OR #10 OR #11 OR #12 OR #13 OR #14 OR #15 OR #16 OR #17 OR #18 OR #19 OR #20 OR #21 OR #22 OR #23 OR #24 OR #25 OR #26 OR #27 OR #28 OR #29 OR #30 OR #31 OR #32 OR #33 OR #34 OR #35 OR #36 OR #37 OR #38 OR #39 OR #40 OR #41 OR #42 OR #43 OR #44 OR #45 OR #46 OR #47 OR #48 OR #49 OR #50 OR #51 OR #52 OR #53 OR #54 OR #55 OR #56 OR #57 OR #58 OR #59 OR #60 OR #61 OR #62 OR #63 OR #64 OR #65 OR #66 OR #67 OR #68) | 1147004     |
| #68    | Search Diagnostic Pattern*[tiab]                                                                                                                                                                                                                                                                                                                                                                                                                                                         | 490         |
| #67    | Search Treatment Pattern*[tiab]                                                                                                                                                                                                                                                                                                                                                                                                                                                          | 3376        |
| #66    | Search Prescribing Pattern*[tiab]                                                                                                                                                                                                                                                                                                                                                                                                                                                        | 2605        |
| #65    | Search Practice Pattern*[tiab]                                                                                                                                                                                                                                                                                                                                                                                                                                                           | 7361        |
| #64    | Search Practice Patterns, Physicians[Mesh]                                                                                                                                                                                                                                                                                                                                                                                                                                               | 52872       |
| #63    | Search Utilization Rate*[tiab]                                                                                                                                                                                                                                                                                                                                                                                                                                                           | 3646        |

| Search | Query                              | Items found |
|--------|------------------------------------|-------------|
| #62    | Search Usage[tiab]                 | 80840       |
| #61    | Search Resource Use[tiab]          | 7250        |
| #60    | Search Health Resource*[tiab]      | 5189        |
| #59    | Search Health Resources[Mesh]      | 23503       |
| #58    | Search Lost Productivity[tiab]     | 1132        |
| #57    | Search VOLP[tiab]                  | 7           |
| #56    | Search Stanford Presenteeism[tiab] | 43          |
| #55    | Search Work Questionnaire[tiab]    | 63          |
| #54    | Search HWQ[tiab]                   | 4           |
| #53    | Search Work Performance*[tiab]     | 2050        |
| #52    | Search WHO-HPQ[tiab]               | 4           |
| #51    | Search Work Limitat*[tiab]         | 332         |
| #50    | Search WLQ[tiab]                   | 79          |
| #49    | Search Work Productivity[tiab]     | 1461        |

| Search | Query                             | Items found |
|--------|-----------------------------------|-------------|
| #48    | Search WPAL[tiab]                 | 263         |
| #47    | Search Medical Saving*[tiab]      | 184         |
| #46    | Search Coinsurance*[tiab]         | 277         |
| #45    | Search Deductible*[tiab]          | 824         |
| #44    | Search Visual-Analog Scale*[tiab] | 22573       |
| #43    | Search Health Utilit*[tiab]       | 1725        |
| #42    | Search Standard Gamble[tiab]      | 795         |
| #41    | Search Time-Trade Off[tiab]       | 1048        |
| #40    | Search QALY*[tiab]                | 8687        |
| #39    | Search Conjoint Analysis[tiab]    | 649         |
| #38    | Search "Willingness to Pay"[tiab] | 4369        |
| #37    | Search Contingent Valuat*[tiab]   | 626         |
| #36    | Search Pricing[tiab]              | 4622        |
| #35    | Search Price*[tiab]               | 32086       |

| Search | Query                                    | Items found |
|--------|------------------------------------------|-------------|
| #34    | Search Pharmacoeconomic*[tiab]           | 3635        |
| #33    | Search Economic*[ti]                     | 41874       |
| #32    | Search Costly[tiab]                      | 30605       |
| #31    | Search Costed[tiab]                      | 296         |
| #30    | Search Costs[tiab]                       | 183757      |
| #29    | Search Cost[tiab]                        | 362717      |
| #28    | Search Disease Burden[tiab]              | 10880       |
| #27    | Search "Burden of Disease"[tiab]         | 7598        |
| #26    | Search ("Costs and Cost Analysis"[Mesh]) | 217339      |
| #25    | Search Budgets[Mesh]                     | 13337       |
| #24    | Search ("Fees and Charges"[Mesh])        | 29359       |
| #23    | Search Economics, Nursing[Mesh]          | 3981        |
| #22    | Search Economics, Pharmaceutical[Mesh]   | 2793        |
| #21    | Search Economics, Medical[Mesh]          | 14037       |

| Search | Query                            | Items found |
|--------|----------------------------------|-------------|
| #20    | Search Economics, Hospital[Mesh] | 23014       |
| #19    | Search HFRDIS[tiab]              | 11          |
| #18    | Search QLICP*[tiab]              | 17          |
| #17    | Search LSQ-32[tiab]              | 2           |
| #16    | Search FACT-ES[tiab]             | 24          |
| #15    | Search FACT-B[tiab]              | 231         |
| #14    | Search EORTC[tiab]               | 7129        |
| #13    | Search QLQ-C15[tiab]             | 3           |
| #12    | Search QLQ-BR23[tiab]            | 202         |
| #11    | Search QLQ-C30[tiab]             | 3243        |
| #10    | Search EuroQoL[tiab]             | 4299        |
| #9     | Search EQ5D[tiab]                | 440         |
| #8     | Search SF-36[tiab]               | 18131       |
| #7     | Search HRQoL[tiab]               | 13296       |

| Search | Query                               | Items found |
|--------|-------------------------------------|-------------|
| #6     | Search Health-Related Quality[tiab] | 36658       |
| #5     | Search QoL[tiab]                    | 31624       |
| #4     | Search "Quality of Life"[tiab]      | 225886      |
| #3     | Search Health Status[tiab]          | 50997       |
| #2     | Search Life Quality[tiab]           | 5653        |
| #1     | Search Quality of Life[Mesh]        | 164999      |

- **EMBASE (ELSEVIER) 21-08-2018**

| No.  | Query                                                                                                                                                                                                                                                                | Results |
|------|----------------------------------------------------------------------------------------------------------------------------------------------------------------------------------------------------------------------------------------------------------------------|---------|
| #113 | #64 AND #75 AND #112                                                                                                                                                                                                                                                 | 941     |
| #112 | #76 OR #77 OR #78 OR #79 OR #80 OR #81 OR #82 OR #83 OR #84 OR #85 OR #86 OR #87 OR #88 OR #89 OR #90 OR #91 OR #92 OR #93 OR #94 OR #95 OR #96 OR #97 OR #98 OR #99 OR #100 OR #101 OR #102 OR #103 OR #104 OR #105 OR #106 OR #107 OR #108 OR #109 OR #110 OR #111 | 437388  |



| No.  | Query                                                                                                     | Results |
|------|-----------------------------------------------------------------------------------------------------------|---------|
| #111 | 'puerto rico'/exp OR 'puerto rico':ab,ti OR puertoric*:ab,ti OR puertorric*:ab,ti OR 'puerto rican':ab,ti | 10534   |
| #110 | 'jamaica'/exp OR jamaic*:ab,ti                                                                            | 5633    |
| #109 | 'haiti'/exp OR haiti*:ab,ti                                                                               | 5001    |
| #108 | 'dominican republic'/exp OR dominica*:ab,ti                                                               | 3646    |
| #107 | 'cuba'/exp OR cuba*:ab,ti                                                                                 | 10291   |
| #106 | 'mexico'/exp OR mexic*:ab,ti OR mejic*:ab,ti                                                              | 76085   |
| #105 | 'panama'/exp OR panam*:ab,ti                                                                              | 5409    |
| #104 | 'nicaragua'/exp OR nicaragu*:ab,ti                                                                        | 2550    |
| #103 | 'honduras'/exp OR hondur*:ab,ti                                                                           | 2262    |
| #102 | 'guatemala'/exp OR guatemal*:ab,ti                                                                        | 4968    |
| #101 | 'el salvador'/exp OR salvador*:ab,ti                                                                      | 4143    |
| #100 | 'costa rica'/exp OR 'costa rica':ab,ti OR costarric*:ab,ti OR costaric*:ab,ti OR 'costa rican':ab,ti      | 5865    |
| #99  | 'belize'/exp OR beliz*:ab,ti                                                                              | 985     |
| #98  | 'venezuela'/exp OR venez*:ab,ti                                                                           | 11298   |

| No. | Query                                                                                                                                                         | Results |
|-----|---------------------------------------------------------------------------------------------------------------------------------------------------------------|---------|
| #97 | 'uruguay'/exp OR uruguay*:ab,ti                                                                                                                               | 3794    |
| #96 | 'suriname'/exp OR surinam*:ab,ti                                                                                                                              | 1885    |
| #95 | 'peru'/exp OR peru*:ab,ti                                                                                                                                     | 17882   |
| #94 | 'paraguay'/exp OR paraguay*:ab,ti                                                                                                                             | 2044    |
| #93 | 'guyana'/exp OR guyan*:ab,ti                                                                                                                                  | 1831    |
| #92 | 'french guiana'/exp OR guiana*:ab,ti                                                                                                                          | 1780    |
| #91 | 'ecuador'/exp OR ecuador*:ab,ti                                                                                                                               | 5948    |
| #90 | 'ecuador'/exp OR ecuador*:ab,ti                                                                                                                               | 5948    |
| #89 | 'chile'/exp OR chile*:ab,ti                                                                                                                                   | 21519   |
| #88 | 'colombia'/exp OR colombia*:ab,ti                                                                                                                             | 20485   |
| #87 | 'brazil'/exp OR brazil*:ab,ti OR brasil*:ab,ti                                                                                                                | 146812  |
| #86 | 'bolivia'/exp OR bolivia*:ab,ti                                                                                                                               | 4664    |
| #85 | 'argentina'/exp OR argentin*:ab,ti                                                                                                                            | 27479   |
| #84 | amerindian*:ab,ti OR indians:ab,ti OR 'american indians':ab,ti OR 'native american':ab,ti OR patagoni*:ab,ti OR andes:ab,ti OR andean*:ab,ti OR amazon*:ab,ti | 38229   |

| No. | Query                                                                                                                                                                                                                   | Results |
|-----|-------------------------------------------------------------------------------------------------------------------------------------------------------------------------------------------------------------------------|---------|
| #83 | 'american indian'/exp                                                                                                                                                                                                   | 17024   |
| #82 | 'caribbean islands'/exp                                                                                                                                                                                                 | 28812   |
| #81 | caribbean*:ab,ti OR caribe*:ab,ti OR 'west indies':ab,ti OR antill*:ab,ti                                                                                                                                               | 18201   |
| #80 | 'caribbean'/exp                                                                                                                                                                                                         | 2076    |
| #79 | 'south america':ab,ti OR southamerica*:ab,ti OR sudamerica*:ab,ti OR 'america del sur':ab,ti OR 'central america':ab,ti OR centroamerica*:ab,ti OR mesoamerica*:ab,ti OR 'meso america':ab,ti OR 'middle america':ab,ti | 18718   |
| #78 | 'latin america':ab,ti OR 'latin america':ti,ab OR latinamerica*:ab,ti OR latinoamerica*:ab,ti OR hispanoamerica:ab,ti OR iberoamerica*:ab,ti OR 'ibero america':ab,ti OR panamerican*:ab,ti                             | 16982   |
| #77 | 'south and central america'/exp                                                                                                                                                                                         | 204827  |
| #76 | americas:ab,ti                                                                                                                                                                                                          | 6980    |
| #75 | #65 OR #66 OR #67 OR #68 OR #69 OR #70 OR #71 OR #72 OR #73 OR #74                                                                                                                                                      | 534178  |
| #74 | 'breast malignancy':ti,ab OR 'breast malignancies':ti,ab                                                                                                                                                                | 1506    |
| #73 | 'breast neoplasm':ti,ab OR 'breast neoplasms':ti,ab                                                                                                                                                                     | 1156    |
| #72 | 'breast carcinoma':ti,ab OR 'breast carcinomas':ti,ab                                                                                                                                                                   | 36644   |
| #71 | 'breast cancer':ti,ab                                                                                                                                                                                                   | 336554  |

| No. | Query                                                                                                                                                                                                                                                                                                                                                                                                                                        | Results |
|-----|----------------------------------------------------------------------------------------------------------------------------------------------------------------------------------------------------------------------------------------------------------------------------------------------------------------------------------------------------------------------------------------------------------------------------------------------|---------|
| #70 | 'breast tumor':ti,ab OR 'breast tumors':ti,ab                                                                                                                                                                                                                                                                                                                                                                                                | 24064   |
| #69 | 'mammary carcinoma':ti,ab OR 'mammary carcinomas':ti,ab                                                                                                                                                                                                                                                                                                                                                                                      | 9918    |
| #68 | 'mammary tumor':ti,ab OR 'mammary tumors':ti,ab                                                                                                                                                                                                                                                                                                                                                                                              | 14129   |
| #67 | 'mammary cancer':ti,ab                                                                                                                                                                                                                                                                                                                                                                                                                       | 3794    |
| #66 | 'mammary neoplasm':ti,ab OR 'mammary neoplasms':ti,ab                                                                                                                                                                                                                                                                                                                                                                                        | 252     |
| #65 | 'breast tumor'/exp                                                                                                                                                                                                                                                                                                                                                                                                                           | 490468  |
| #64 | #1 OR #2 OR #3 OR #4 OR #5 OR #6 OR #7 OR #8 OR #9 OR #10 OR #11 OR #12 OR #13 OR #14 OR #15 OR #16 OR #17 OR #18 OR #19 OR #20 OR #21 OR #22 OR #23 OR #24 OR #25 OR #26 OR #27 OR #28 OR #29 OR #30 OR #31 OR #32 OR #33 OR #34 OR #35 OR #36 OR #37 OR #38 OR #39 OR #40 OR #41 OR #42 OR #43 OR #44 OR #45 OR #46 OR #47 OR #48 OR #49 OR #50 OR #51 OR #52 OR #53 OR #54 OR #55 OR #56 OR #57 OR #58 OR #59 OR #60 OR #61 OR #62 OR #63 | 2053279 |
| #63 | 'diagnostic pattern':ti,ab OR 'diagnostic patterns':ti,ab                                                                                                                                                                                                                                                                                                                                                                                    | 652     |
| #62 | 'treatment pattern':ti,ab OR 'treatment patterns':ti,ab                                                                                                                                                                                                                                                                                                                                                                                      | 7301    |
| #61 | 'prescribing pattern':ti,ab OR 'prescribing patterns':ti,ab                                                                                                                                                                                                                                                                                                                                                                                  | 4323    |
| #60 | 'practice pattern':ti,ab OR 'practice patterns':ti,ab                                                                                                                                                                                                                                                                                                                                                                                        | 10589   |
| #59 | 'clinical practice'/exp                                                                                                                                                                                                                                                                                                                                                                                                                      | 242395  |

| No. | Query                         | Results |
|-----|-------------------------------|---------|
| #58 | 'utilization rate':ti,ab      | 2474    |
| #57 | usage:ti,ab                   | 108439  |
| #56 | 'resource use':ti,ab          | 10571   |
| #55 | 'health resources':ti,ab      | 4931    |
| #54 | 'lost productivity':ti,ab     | 1630    |
| #53 | volp:ti,ab                    | 13      |
| #52 | 'stanford presenteeism':ti,ab | 47      |
| #51 | 'work questionnaire':ti,ab    | 90      |
| #50 | hwq:ti,ab                     | 6       |
| #49 | 'work performance':ti,ab      | 2666    |
| #48 | 'who hpq':ti,ab               | 10      |
| #47 | 'work limitation':ti,ab       | 127     |
| #46 | wlq:ti,ab                     | 156     |
| #45 | 'work productivity':ti,ab     | 3204    |

| No. | Query                                              | Results |
|-----|----------------------------------------------------|---------|
| #44 | wpai:ti,ab                                         | 1173    |
| #43 | 'medical saving':ti,ab OR 'medical savings':ti,ab  | 219     |
| #42 | coinsurance*:ti,ab                                 | 391     |
| #41 | deductible*:ti,ab                                  | 1046    |
| #40 | 'visual analog scale':ti,ab                        | 26680   |
| #39 | 'health utilities':ti,ab OR 'health utility':ti,ab | 2725    |
| #38 | 'standard gamble':ti,ab                            | 1002    |
| #37 | 'time trade off':ti,ab                             | 1477    |
| #36 | qaly*:ti,ab                                        | 15786   |
| #35 | 'conjoint analysis':ti,ab                          | 794     |
| #34 | 'willingness to pay':ti,ab                         | 6599    |
| #33 | 'contingent valuation':ti,ab                       | 754     |
| #32 | pricing:ti,ab                                      | 6710    |
| #31 | price*:ti,ab                                       | 44709   |

| No. | Query                   | Results |
|-----|-------------------------|---------|
| #30 | pharmacoeconomic*:ti,ab | 7341    |
| #29 | economic*:ti            | 53320   |
| #28 | costly:ti,ab            | 40693   |
| #27 | costed:ti,ab            | 470     |
| #26 | costs:ti,ab             | 255341  |
| #25 | cost:ti,ab              | 475818  |
| #24 | 'disease burden':ti,ab  | 16623   |
| #23 | 'disease burden'/exp    | 26766   |
| #22 | 'cost'/exp              | 321996  |
| #21 | 'budget'/exp            | 25541   |
| #20 | 'health economics'/exp  | 779220  |
| #19 | hfrdis:ti,ab            | 28      |
| #18 | qlicp*:ti,ab            | 27      |
| #17 | 'lsq-32':ti,ab          | 2       |

| No. | Query                          | Results |
|-----|--------------------------------|---------|
| #16 | 'fact-es':ti,ab                | 74      |
| #15 | 'fact-b':ti,ab                 | 533     |
| #14 | eortc:ti,ab                    | 14557   |
| #13 | 'qlq c15':ti,ab                | 184     |
| #12 | 'qlq br23':ti,ab               | 374     |
| #11 | 'qlq c30':ti,ab                | 6308    |
| #10 | euroqol:ti,ab                  | 6384    |
| #9  | eq5d:ti,ab                     | 1387    |
| #8  | 'sf 36':ti,ab                  | 29105   |
| #7  | hrqol:ti,ab                    | 20979   |
| #6  | 'health related quality':ti,ab | 50857   |
| #5  | qol:ti,ab                      | 59077   |
| #4  | 'quality of life':ti,ab        | 345484  |
| #3  | 'health status':ti,ab          | 63091   |



| No. | Query                 | Results |
|-----|-----------------------|---------|
| #2  | 'life quality':ti,ab  | 10858   |
| #1  | 'quality of life'/exp | 424958  |

- **LILACS (BVS-ENGLISH) 23 -08-2018**

|                    |                                                                                                                                                                                                                                                                                                                                                                                                                                                                                           |
|--------------------|-------------------------------------------------------------------------------------------------------------------------------------------------------------------------------------------------------------------------------------------------------------------------------------------------------------------------------------------------------------------------------------------------------------------------------------------------------------------------------------------|
| Database :         | LILACS                                                                                                                                                                                                                                                                                                                                                                                                                                                                                    |
| Search on :        | MH Breast Neoplasm AND (MH Quality of Life OR MH Economics, Hospital OR MH Economics, Medical OR MH Economics, Pharmaceutical OR MH Economics, Nursing OR MH “Fees and Charges” OR MH Budgets OR MH “Costs and Cost Analysis” OR ((productividad OR productivity OR Produtividade) AND (loss OR perdida OR perda) AND (work OR laboral OR trabajo OR trabalho)) OR WPAI OR WHO-HPQ OR Presenteeism OR Presentismo OR Presenteismo OR ((Resource\$ OR Recursos) AND (Uso OR Use))) [Words] |
| References found : | 175 [refine]                                                                                                                                                                                                                                                                                                                                                                                                                                                                              |

- **ECONLIT (EBSCO) 23-08-2018**

| #   | Query       | Results |
|-----|-------------|---------|
| S68 | S66 AND S67 | 4       |

|     |                                                                                                                                                                                                                                                                                                                                                                                                                                                                                                                                                                                                                                                                                                                                                                                                                                                                                                                                                                                                                                                                                                                                                                                                                                                                                                                                                                                                                                                                                                                                                                                                                                                                                                                                                                                                                                                                                                                                                                                                                                                                                                                                                          |        |
|-----|----------------------------------------------------------------------------------------------------------------------------------------------------------------------------------------------------------------------------------------------------------------------------------------------------------------------------------------------------------------------------------------------------------------------------------------------------------------------------------------------------------------------------------------------------------------------------------------------------------------------------------------------------------------------------------------------------------------------------------------------------------------------------------------------------------------------------------------------------------------------------------------------------------------------------------------------------------------------------------------------------------------------------------------------------------------------------------------------------------------------------------------------------------------------------------------------------------------------------------------------------------------------------------------------------------------------------------------------------------------------------------------------------------------------------------------------------------------------------------------------------------------------------------------------------------------------------------------------------------------------------------------------------------------------------------------------------------------------------------------------------------------------------------------------------------------------------------------------------------------------------------------------------------------------------------------------------------------------------------------------------------------------------------------------------------------------------------------------------------------------------------------------------------|--------|
| S67 | TI ( Latin America* OR Latinamerica* OR Latinoamerica* OR Latin* OR Hispanic Americans OR Hispanic America* OR Hispanoamerica* OR Hispano* OR Hispanic* OR Iberoamerica* OR Ibero Americ* OR Panamerican* OR Central America* OR Centroamerica* OR Mesoamerica* OR Meso America* OR Middle America* OR South America* OR Southamerica* OR Sudamerica* OR America del sur OR Caribbean OR Caribe* OR West Indi* OR Antill* OR Amerindian* OR Indians OR American Indian* OR Native America* OR Patagoni* OR Andes OR Andean* OR Amazon* OR Argentin* OR Bolivia* OR Brazil* OR Brasil* Colombia* OR Colombia* OR Colombia OR Chile* OR Ecuador* OR Guiana* OR Guyan* OR Guyan* OR Paraguay* OR Paraguay* OR Peru* OR Surinam* OR Surinam* OR Uruguay* OR Venez* OR Belize* OR Costa Ric* OR Costarric* OR Costaric* OR Costa Ric* OR Costarric* OR Salvador* OR Salvador* OR El Salvador OR Guatemal* OR Guatemal* OR Guatemala OR Hondur* OR Nicaragu* Panam* OR Mexic* OR Cuba* OR Dominic* OR Dominic* OR Haiti* OR Jamaic* OR Puerto Ric* OR Puertoric* OR Puertoric* ) OR AB ( Latin America* OR Latinamerica* OR Latinoamerica* OR Latin* OR Hispanic Americans OR Hispanic America* OR Hispanoamerica* OR Hispano* OR Hispanic* OR Iberoamerica* OR Ibero Americ* OR Panamerican* OR Central America* OR Centroamerica* OR Mesoamerica* OR Meso America* OR Middle America* OR South America* OR Southamerica* OR Sudamerica* OR America del sur OR Caribbean OR Caribe* OR West Indi* OR Antill* OR Amerindian* OR Indians OR American Indian* OR Native America* OR Patagoni* OR Andes OR Andean* OR Amazon* OR Argentin* OR Bolivia* OR Brazil* OR Brasil* Colombia* OR Colombia* OR Colombia OR Chile* OR Ecuador* OR Guiana* OR Guyan* OR Guyan* OR Paraguay* OR Paraguay* OR Peru* OR Surinam* OR Surinam* OR Uruguay* OR Venez* OR Belize* OR Costa Ric* OR Costarric* OR Costaric* OR Costa Ric* OR Costarric* OR Salvador* OR Salvador* OR El Salvador OR Guatemal* OR Guatemal* OR Guatemala OR Hondur* OR Nicaragu* Panam* OR Mexic* OR Cuba* OR Dominic* OR Dominic* OR Haiti* OR Jamaic* OR Puerto Ric* OR Puertoric* OR Puertoric* ) | 75,822 |
| S66 | S55 AND S65                                                                                                                                                                                                                                                                                                                                                                                                                                                                                                                                                                                                                                                                                                                                                                                                                                                                                                                                                                                                                                                                                                                                                                                                                                                                                                                                                                                                                                                                                                                                                                                                                                                                                                                                                                                                                                                                                                                                                                                                                                                                                                                                              | 134    |
| S65 | S56 OR S57 OR S58 OR S59 OR S60 OR S61 OR S62 OR S63 OR S64                                                                                                                                                                                                                                                                                                                                                                                                                                                                                                                                                                                                                                                                                                                                                                                                                                                                                                                                                                                                                                                                                                                                                                                                                                                                                                                                                                                                                                                                                                                                                                                                                                                                                                                                                                                                                                                                                                                                                                                                                                                                                              | 297    |
| S64 | TI Breast Malignan* OR AB Breast Malignan*                                                                                                                                                                                                                                                                                                                                                                                                                                                                                                                                                                                                                                                                                                                                                                                                                                                                                                                                                                                                                                                                                                                                                                                                                                                                                                                                                                                                                                                                                                                                                                                                                                                                                                                                                                                                                                                                                                                                                                                                                                                                                                               | 4      |
| S63 | TI Breast Neoplas* OR AB Breast Neoplas*                                                                                                                                                                                                                                                                                                                                                                                                                                                                                                                                                                                                                                                                                                                                                                                                                                                                                                                                                                                                                                                                                                                                                                                                                                                                                                                                                                                                                                                                                                                                                                                                                                                                                                                                                                                                                                                                                                                                                                                                                                                                                                                 | 1      |
| S62 | TI Breast Carcinom* OR AB Breast Carcinom*                                                                                                                                                                                                                                                                                                                                                                                                                                                                                                                                                                                                                                                                                                                                                                                                                                                                                                                                                                                                                                                                                                                                                                                                                                                                                                                                                                                                                                                                                                                                                                                                                                                                                                                                                                                                                                                                                                                                                                                                                                                                                                               | 6      |
| S61 | TI Breast Cancer OR AB Breast Cancer                                                                                                                                                                                                                                                                                                                                                                                                                                                                                                                                                                                                                                                                                                                                                                                                                                                                                                                                                                                                                                                                                                                                                                                                                                                                                                                                                                                                                                                                                                                                                                                                                                                                                                                                                                                                                                                                                                                                                                                                                                                                                                                     | 296    |

|     |                                                                                                                                                                                                                                                                                                                                                                               |         |
|-----|-------------------------------------------------------------------------------------------------------------------------------------------------------------------------------------------------------------------------------------------------------------------------------------------------------------------------------------------------------------------------------|---------|
| S60 | TI Breast Tumor* OR AB Breast Tumor*                                                                                                                                                                                                                                                                                                                                          | 12      |
| S59 | TI Mammary Carcinom* OR AB Mammary Carcinom*                                                                                                                                                                                                                                                                                                                                  | 0       |
| S58 | TI Mammary Tumor* OR AB Mammary Tumor*                                                                                                                                                                                                                                                                                                                                        | 1       |
| S57 | TI Mammary Cancer OR AB Mammary Cancer                                                                                                                                                                                                                                                                                                                                        | 0       |
| S56 | TI Mammary Neoplas* OR AB Mammary Neoplas*                                                                                                                                                                                                                                                                                                                                    | 0       |
| S55 | S1 OR S2 OR S3 OR S4 OR S5 OR S6 OR S7 OR S8 OR S9 OR S10 OR S11 OR S12 OR S13 OR S14 OR S15 OR S16 OR S17 OR S18 OR S19 OR S20 OR S21 OR S22 OR S23 OR S24 OR S25 OR S26 OR S27 OR S28 OR S29 OR S30 OR S31 OR S32 OR S33 OR S34 OR S35 OR S36 OR S37 OR S38 OR S39 OR S40 OR S41 OR S42 OR S43 OR S44 OR S45 OR S46 OR S47 OR S48 OR S49 OR S50 OR S51 OR S52 OR S53 OR S54 | 413,296 |
| S54 | TI Treatment Pattern* OR AB Treatment Pattern*                                                                                                                                                                                                                                                                                                                                | 699     |
| S53 | TI Prescribing Pattern* OR AB Prescribing Pattern*                                                                                                                                                                                                                                                                                                                            | 28      |
| S52 | TI Practice Pattern* OR AB Practice Pattern*                                                                                                                                                                                                                                                                                                                                  | 1,538   |
| S51 | TI Usage OR AB Usage                                                                                                                                                                                                                                                                                                                                                          | 4,878   |
| S50 | TI Resource Use OR AB Resource Use                                                                                                                                                                                                                                                                                                                                            | 12,024  |
| S49 | TI Health Resource* OR AB Health Resource*                                                                                                                                                                                                                                                                                                                                    | 3,492   |
| S48 | TI Lost Productivity OR AB Lost Productivity                                                                                                                                                                                                                                                                                                                                  | 275     |
| S47 | TI VOLP OR AB VOLP                                                                                                                                                                                                                                                                                                                                                            | 1       |
| S46 | TI Stanford Presenteeism OR AB Stanford Presenteeism                                                                                                                                                                                                                                                                                                                          | 0       |
| S45 | TI Work Questionnaire OR AB Work Questionnaire                                                                                                                                                                                                                                                                                                                                | 837     |

|     |                                                  |         |
|-----|--------------------------------------------------|---------|
| S44 | TI HWQ OR AB HWQ                                 | 0       |
| S43 | TI Work Performance OR AB Work Performance       | 5,672   |
| S42 | TI WHO-HPQ OR AB WHO-HPQ                         | 0       |
| S41 | TI Work Limitat* OR AB Work Limitat*             | 1,041   |
| S40 | TI Work Productivity OR AB Work Productivity     | 3,448   |
| S39 | TI WPAI OR AB WPAI                               | 2       |
| S38 | TI Medical Saving* OR AB Medical Saving*         | 382     |
| S37 | TI Coinsurance* OR AB Coinsurance*               | 191     |
| S36 | TI Deductible* OR AB Deductible*                 | 582     |
| S35 | TI Visual Analog Scale OR AB Visual Analog Scale | 52      |
| S34 | TI Health Utilit* OR AB Health Utilit*           | 1,180   |
| S33 | TI Standard Gamble OR AB Standard Gamble         | 120     |
| S32 | TI Time Trade Off OR AB Time Trade Off           | 1,840   |
| S31 | TI QALY* OR AB QALY*                             | 428     |
| S30 | TI Conjoint Analysis OR AB Conjoint Analysis     | 528     |
| S29 | TI Willingness to Pay OR AB Willingness to Pay   | 5,333   |
| S28 | TI Contingent Valuat* OR AB Contingent Valuat*   | 2,564   |
| S27 | TI ( Price OR Prices ) OR AB ( Price OR Prices ) | 138,874 |

|     |                                              |         |
|-----|----------------------------------------------|---------|
| S26 | TI Pharmacoeconomic* OR AB Pharmacoeconomic* | 243     |
| S25 | TI Economic*                                 | 130,932 |
| S24 | TI Costly OR AB Costly                       | 9,179   |
| S23 | TI Costed OR AB Costed                       | 16      |
| S22 | TI ( Cost OR Costs ) OR AB ( Cost OR Costs ) | 130,521 |
| S21 | TI Disease Burden OR AB Disease Burden       | 393     |
| S20 | TI Burden of Disease OR AB Burden of Disease | 393     |
| S19 | TI Budget* OR AB Budget*                     | 21,951  |
| S18 | TI HFRDIS OR AB HFRDIS                       | 0       |
| S17 | TI QLICP* OR AB QLICP*                       | 0       |
| S16 | TI LSQ-32 OR AB LSQ-32                       | 0       |
| S15 | TI FACT-ES OR AB FACT-ES                     | 0       |
| S14 | TI FACT-B OR AB FACT-B                       | 2       |
| S13 | TI EORTC OR AB EORTC                         | 1       |
| S12 | TI QLQ-C15 OR AB QLQ-C15                     | 0       |
| S11 | TI QLQ-BR23 OR AB QLQ-BR23                   | 0       |
| S10 | TI QLQ-C30 OR AB QLQ-C30                     | 1       |
| S9  | TI EuroQoL OR AB EuroQoL                     | 46      |

|    |                                                        |       |
|----|--------------------------------------------------------|-------|
| S8 | TI EQ5D OR AB EQ5D                                     | 147   |
| S7 | TI SF-36 OR AB SF-36                                   | 41    |
| S6 | TI HRQoL OR AB HRQoL                                   | 46    |
| S5 | TI Health Related Quality OR AB Health Related Quality | 724   |
| S4 | TI QoL OR AB QoL                                       | 165   |
| S3 | TI Quality of Life OR AB Quality of Life               | 5,119 |
| S2 | TI Health Status OR AB Health Status                   | 4,396 |
| S1 | TI Life Quality OR AB Life Quality                     | 5,119 |

- **CRD (YORK) 28-08-2018**

| Line | Search                                              | Hits |
|------|-----------------------------------------------------|------|
| 1    | (MeSH DESCRIPTOR Quality of Life EXPLODE ALL TREES) | 2724 |
| 2    | (Life Quality )                                     | 487  |
| 3    | (Health Status )                                    | 1083 |
| 4    | (Quality of Life)                                   | 8662 |

|    |                          |      |
|----|--------------------------|------|
| 5  | (QoL )                   | 380  |
| 6  | (Health-Related Quality) | 1026 |
| 7  | (HRQoL )                 | 151  |
| 8  | (SF-36 )                 | 347  |
| 9  | (EQ5D )                  | 14   |
| 10 | (EuroQoL )               | 253  |
| 11 | (QLQ-C30 )               | 33   |
| 12 | (QLQ-BR23 )              | 0    |
| 13 | (QLQ-C15 )               | 0    |
| 14 | (EORTC )                 | 66   |
| 15 | (FACT-B )                | 4    |
| 16 | (FACT-ES )               | 0    |
| 17 | (LSQ-32 )                | 0    |
| 18 | (QLICP*)                 | 0    |

|    |                                                             |       |
|----|-------------------------------------------------------------|-------|
| 19 | (HFRDIS )                                                   | 0     |
| 20 | MeSH DESCRIPTOR Economics, Hospital EXPLODE ALL TREES       | 1247  |
| 21 | MeSH DESCRIPTOR Economics, Medical EXPLODE ALL TREES        | 53    |
| 22 | MeSH DESCRIPTOR Economics, Pharmaceutical EXPLODE ALL TREES | 199   |
| 23 | MeSH DESCRIPTOR Economics, Nursing EXPLODE ALL TREES        | 9     |
| 24 | MeSH DESCRIPTOR Fees and Charges EXPLODE ALL TREES          | 290   |
| 25 | MeSH DESCRIPTOR Budgets EXPLODE ALL TREES                   | 54    |
| 26 | MeSH DESCRIPTOR Costs and Cost Analysis EXPLODE ALL TREES   | 17164 |
| 27 | (Burden of Disease)                                         | 130   |
| 28 | (Disease Burden )                                           | 51    |
| 29 | (Cost OR Costs OR Costed OR Costly)                         | 24118 |
| 30 | (Economic*):TI                                              | 3274  |
| 31 | (Pharmacoeconomic*)                                         | 1016  |
| 32 | (Price* OR Pricing)                                         | 9442  |



|    |                       |      |
|----|-----------------------|------|
| 33 | (Contingent Valuat* ) | 8    |
| 34 | (Willingness to Pay)  | 923  |
| 35 | (Conjoint Analysis )  | 6    |
| 36 | (QALY*)               | 3263 |
| 37 | (Time Trade Off )     | 368  |
| 38 | (Standard Gamble )    | 203  |
| 39 | (Health Utilit* )     | 300  |
| 40 | (Visual Analog Scale) | 56   |
| 41 | (Deductible*)         | 8    |
| 42 | (Coinsurance*)        | 7    |
| 43 | (Medical Saving* )    | 6    |
| 44 | (WPAI )               | 1    |
| 45 | (Work Productivity)   | 28   |
| 46 | (WLQ)                 | 1    |

|    |                                                                  |      |
|----|------------------------------------------------------------------|------|
| 47 | (Work Limitat* )                                                 | 3    |
| 48 | (WHO-HPQ )                                                       | 0    |
| 49 | (Work Performance*)                                              | 8    |
| 50 | (HWQ )                                                           | 0    |
| 51 | (Work Questionnaire )                                            | 0    |
| 52 | (Stanford Presenteeism )                                         | 0    |
| 53 | (VOLP )                                                          | 1    |
| 54 | (Lost Productivity )                                             | 297  |
| 55 | MeSH DESCRIPTOR Health Resources EXPLODE ALL TREES               | 287  |
| 56 | (Health Resource*)                                               | 424  |
| 57 | (Resource Use )                                                  | 5987 |
| 58 | (Usage)                                                          | 507  |
| 59 | (Utilization Rate*)                                              | 5    |
| 60 | MeSH DESCRIPTOR Practice Patterns, Physicians' EXPLODE ALL TREES | 258  |

|    |                                                                                                                                                                                                                                                                                                                                                                                                                                                     |       |
|----|-----------------------------------------------------------------------------------------------------------------------------------------------------------------------------------------------------------------------------------------------------------------------------------------------------------------------------------------------------------------------------------------------------------------------------------------------------|-------|
| 61 | (Practice Pattern* )                                                                                                                                                                                                                                                                                                                                                                                                                                | 341   |
| 62 | (Prescribing Pattern*)                                                                                                                                                                                                                                                                                                                                                                                                                              | 34    |
| 63 | (Treatment Pattern* )                                                                                                                                                                                                                                                                                                                                                                                                                               | 260   |
| 64 | (Diagnostic Pattern*)                                                                                                                                                                                                                                                                                                                                                                                                                               | 7     |
| 65 | #1 OR #2 OR #3 OR #4 OR #5 OR #6 OR #7 OR #8 OR #9 OR #10 OR #11 OR #12 OR #13 OR #14 OR #15 OR #16 OR #17 OR #18 OR #19 OR #20 OR #21 OR #22 OR #23 OR #24 OR #25 OR #26 OR #27 OR #28 OR #29 OR #30 OR #31 OR #32 OR #33 OR #34 OR #35 OR #36 OR #37 OR #38 OR #39 OR #40 OR #41 OR #42 OR #43 OR #44 OR #45 OR #46 OR #47 OR #48 OR #49 OR #50 OR #51 OR #52 OR #53 OR #54 OR #55 OR #56 OR #57 OR #58 OR #59 OR #60 OR #61 OR #62 OR #63 OR #64 | 28698 |
| 66 | MeSH DESCRIPTOR Breast Neoplasms EXPLODE ALL TREES                                                                                                                                                                                                                                                                                                                                                                                                  | 1798  |
| 67 | (Mammary Neoplas*)                                                                                                                                                                                                                                                                                                                                                                                                                                  | 0     |
| 68 | (Mammary Cancer )                                                                                                                                                                                                                                                                                                                                                                                                                                   | 0     |
| 69 | (Mammary Tumor)                                                                                                                                                                                                                                                                                                                                                                                                                                     | 0     |
| 70 | (Mammary Tumors)                                                                                                                                                                                                                                                                                                                                                                                                                                    | 0     |
| 71 | (Mammary Carcinom*)                                                                                                                                                                                                                                                                                                                                                                                                                                 | 2     |
| 72 | (Breast Tumor*)                                                                                                                                                                                                                                                                                                                                                                                                                                     | 16    |

|    |                                                                                                                                                                                                                                                                                                                                                                                                                                                                                                                                                                                                                                                                                                                                                                                                                                                                                                                                                                                                                                                                              |      |
|----|------------------------------------------------------------------------------------------------------------------------------------------------------------------------------------------------------------------------------------------------------------------------------------------------------------------------------------------------------------------------------------------------------------------------------------------------------------------------------------------------------------------------------------------------------------------------------------------------------------------------------------------------------------------------------------------------------------------------------------------------------------------------------------------------------------------------------------------------------------------------------------------------------------------------------------------------------------------------------------------------------------------------------------------------------------------------------|------|
| 73 | (Breast Cancer )                                                                                                                                                                                                                                                                                                                                                                                                                                                                                                                                                                                                                                                                                                                                                                                                                                                                                                                                                                                                                                                             | 2038 |
| 74 | (Breast Carcinom* )                                                                                                                                                                                                                                                                                                                                                                                                                                                                                                                                                                                                                                                                                                                                                                                                                                                                                                                                                                                                                                                          | 39   |
| 75 | (Breast Neoplas*)                                                                                                                                                                                                                                                                                                                                                                                                                                                                                                                                                                                                                                                                                                                                                                                                                                                                                                                                                                                                                                                            | 1906 |
| 76 | (Breast Malignan*)                                                                                                                                                                                                                                                                                                                                                                                                                                                                                                                                                                                                                                                                                                                                                                                                                                                                                                                                                                                                                                                           | 3    |
| 77 | #66 OR #67 OR #68 OR #69 OR #70 OR #71 OR #72 OR #73 OR #74 OR #75 OR #76                                                                                                                                                                                                                                                                                                                                                                                                                                                                                                                                                                                                                                                                                                                                                                                                                                                                                                                                                                                                    | 2360 |
| 78 | #65 AND #77                                                                                                                                                                                                                                                                                                                                                                                                                                                                                                                                                                                                                                                                                                                                                                                                                                                                                                                                                                                                                                                                  | 1030 |
| 79 | (Latin America* OR Latinamerica* OR Latinoamerica* OR Latin* OR Hispanic Americans OR Hispanic America* OR Hispanoamerica* OR Hispano* OR Hispanic* OR Iberoamerica* OR Ibero Americ* OR Panamerican* OR Central America* OR Centroamerica* OR Mesoamerica* OR Meso America* OR Middle America* OR South America* OR Southamerica* OR Sudamerica* OR America del sur OR Caribbean OR Caribe* OR West Indi* OR Antill* OR Amerindian* OR Indians OR American Indian* OR Native America* OR Patagoni* OR Andes OR Andean* OR Amazon* OR Argentin* OR Bolivia* OR Brazil* OR Brasil* OR Colombia* OR Colombia* OR Colombia OR Chile* OR Ecuador* OR Guiana* OR Guyan* OR Guyan* OR Paraguay* OR Paraguay* OR Peru* OR Surinam* OR Surinam* OR Uruguay* OR Venez* OR Belize* OR Costa Ric* OR Costarric* OR Costaric* OR Costa Ric* OR Costarric* OR Salvador* OR Salvador* OR El Salvador OR Guatemal* OR Guatemal* OR Guatemala OR Hondur* OR Nicaragu* OR Panam* OR Mexic* OR Cuba* OR Dominic* OR Dominic* OR Haiti* OR Jamaic* OR Puerto Ric* OR Puertorric* OR Puertoric*) | 1521 |
| 80 | MeSH DESCRIPTOR Latin America EXPLODE ALL TREES                                                                                                                                                                                                                                                                                                                                                                                                                                                                                                                                                                                                                                                                                                                                                                                                                                                                                                                                                                                                                              | 26   |
| 81 | MeSH DESCRIPTOR Central America EXPLODE ALL TREES                                                                                                                                                                                                                                                                                                                                                                                                                                                                                                                                                                                                                                                                                                                                                                                                                                                                                                                                                                                                                            | 14   |
| 82 | MeSH DESCRIPTOR South America EXPLODE ALL TREES                                                                                                                                                                                                                                                                                                                                                                                                                                                                                                                                                                                                                                                                                                                                                                                                                                                                                                                                                                                                                              | 214  |

|    |                                                             |      |
|----|-------------------------------------------------------------|------|
| 83 | MeSH DESCRIPTOR Caribbean Region EXPLODE ALL TREES          | 35   |
| 84 | MeSH DESCRIPTOR West Indies EXPLODE ALL TREES               | 24   |
| 85 | MeSH DESCRIPTOR Indians, South American EXPLODE ALL TREES   | 0    |
| 86 | MeSH DESCRIPTOR Indians, Central American EXPLODE ALL TREES | 0    |
| 87 | #79 OR #80 OR #81 OR #82 OR #83 OR #84 OR #85 OR #86        | 1531 |
| 88 | #78 AND #87                                                 | 23   |

## S2. Quality assessment tool

Criteria list for assessing the methodological quality of studies on quality of life.

Positive if:

1. Socio-demographic and medical data is described (e.g., age, race, employment status, educational status, tumour stage at diagnosis etc.).
2. Inclusion and/or exclusion criteria are formulated.
3. The process of data collection is described (e.g., interview or self-report etc.).
4. The type of cancer treatment is described.
5. Participation and response rates for patient groups have to be described and have to be more than 75%.
6. A standardized or valid quality of life questionnaire is used.
7. The mean, median, standard deviations or percentages reported for the most important outcomes.
8. All domains of questionnaire are reported.
9. Patient signed an informed consent form before study participation.
10. The degree of selection of the patient sample is described.

Each item was assigned one point. If an item did not meet our criteria or was described insufficiently or not at all, zero points were assigned. The highest possible score was thus 10. Studies scoring 75% or more of the maximum attainable score were arbitrarily considered to be of high quality. Studies scoring between 50% and 75% were rated as moderate quality. Studies scoring lower than 50% were considered low quality.

S3.

Domains of different instruments by Country and stage

SF36

| Table A. Meta-analysis of HRQoL by SF-36 broken down by country and stage. |                       |                       |                       |                       |                       |                       |                       |
|----------------------------------------------------------------------------|-----------------------|-----------------------|-----------------------|-----------------------|-----------------------|-----------------------|-----------------------|
| Stage                                                                      | I-II and III          |                       |                       |                       |                       |                       | IV                    |
| Country                                                                    | Argentina             | Brazil                | Colombia              | Mexico                | Peru                  | Uruguay               | Colombia              |
| Studies                                                                    | 1                     | 11                    | 1                     | 2                     | 2                     | 1                     | 1                     |
| N                                                                          | 221                   | 897                   | 35                    | 199                   | 153                   | 116                   | 4                     |
| Physical Functioning                                                       | 84<br>(83.9 - 84.1)   | 70.2<br>(66.1 - 74.3) | 42.9<br>(34.8 - 50.9) | 72.6<br>(56.9 - 88.2) | 66.7<br>(54.1 - 79.2) | 74<br>(71.8 - 76.2)   | 20.8<br>(8.3 - 33.3)  |
| Role Physical                                                              | 77.5<br>(77.3 - 77.7) | 48<br>(36.5 - 59.5)   | 28<br>(13.9 - 42)     | 52.4<br>(44.3 - 60.4) | 53.9<br>(15 - 92.8)   | 66.8<br>(62.2 - 71.4) | 12.5<br>(0 - 37)      |
| Bodily Pain                                                                | 78<br>(77.9 - 78.1)   | 58<br>(52.4 - 63.5)   | 30.5<br>(20.1 - 40.9) | 70.1<br>(58 - 82.3)   | 73.2<br>(68 - 78.5)   | 63<br>(58.8 - 67.2)   | 38.6<br>(3.5 - 73.7)  |
| General Health                                                             | 74<br>(73.9 - 74.1)   | 70<br>(66.4 - 73.6)   | 58.5<br>(48.8 - 68.2) | 62.1<br>(53.8 - 70.3) | 65.5<br>(62.5 - 68.6) | 58<br>(54.4 - 61.5)   | 38.7<br>(11.5 - 65.9) |
| Vitality                                                                   | 60<br>(59.9 - 60.1)   | 64<br>(60.9 - 67.2)   | 55.8<br>(47.7 - 63.9) | 66.2<br>(55.7 - 76.8) | 75.6<br>(63.7 - 87.6) | 54.7<br>(51.7 - 57.7) | 39.5<br>(6.7 - 72.3)  |
| Social Functioning                                                         | 85.5<br>(85.3 - 85.7) | 78.4<br>(72.3 - 84.4) | 38.1<br>(32.5 - 43.6) | 75.6<br>(64.7 - 86.5) | 72.4<br>(65.5 - 79.4) | 70.7<br>(65.4 - 76)   | 45<br>(40.6 - 49.4)   |
| Role Emotional                                                             | 77<br>(76.8 - 77.2)   | 66.8<br>(52.3 - 81.2) | 40.7<br>(33.7 - 47.8) | 56.9<br>(48 - 65.7)   | 68.8<br>(62.4 - 75.2) | 67.6<br>(63.1 - 72.1) | 20.8<br>(0 - 45.3)    |
| Mental Health                                                              | 74<br>(73.8 - 74.2)   | 70.2<br>(67.2 - 73.2) | 60.8<br>(52 - 69.7)   | 66.6<br>(59.7 - 73.4) | 71<br>(64.9 - 77)     | 48.4<br>(44.7 - 52)   | 45<br>(14.3 - 75.7)   |

QLQ-C30



**Table B. Meta-analysis of HRQoL by EORTC QLQ-C30 broken down by country and stage.**

| Stage                      | I-II and III          |                       |                       |                       |                       |                       |                       |                       | IV                    |                       |
|----------------------------|-----------------------|-----------------------|-----------------------|-----------------------|-----------------------|-----------------------|-----------------------|-----------------------|-----------------------|-----------------------|
| Country                    | Argentina             | Brazil                | Chile                 | Colombia              | Ecuador               | Mexico                | Paraguay              | Peru                  | Brazil                | Mexico                |
| Studies                    | 3                     | 13                    | 2                     | 2                     | 1                     | 5                     | 1                     | 1                     | 2                     | 1                     |
| N                          | 343                   | 2245                  | 123                   | 457                   | 40                    | 782                   | 125                   | 76                    | 248                   | 47                    |
| Global health status / QoL | 69.8<br>(56.9 - 82.6) | 70.1<br>(65.9 - 74.4) | 72.5<br>(68.7 - 76.2) | 74.8<br>(70.4 - 79.3) | 62.5<br>(59.3 - 65.7) | 73.7<br>(69.8 - 77.6) | 60.7<br>(57.7 - 63.7) | 77.1<br>(72.3 - 81.9) | 64.5<br>(54.8 - 74.2) | 66.5<br>(59.5 - 73.4) |
| <b>Functional scales</b>   |                       |                       |                       |                       |                       |                       |                       |                       |                       |                       |
| Physical functioning       | 78.4<br>(63.8 - 93)   | 75.9<br>(72.9 - 78.8) | 89.4<br>(87.3 - 91.5) | 87.8<br>(86.6 - 89)   | 87<br>(82.9 - 91.1)   | 76.6<br>(60.5 - 92.7) | 85.3<br>(82 - 88.6)   | 38.9<br>(34.9 - 42.9) | 64.5<br>(59.4 - 69.7) | 77<br>(74.7 - 79.3)   |
| Role functioning           | 77.2<br>(60.3 - 94)   | 70.3<br>(63.4 - 77.1) | 86.4(78.7 - 94)       | 87.6<br>(84.2 - 91)   | 91.3<br>(85.3 - 97.2) | 71.4<br>(61.1 - 81.7) | NR                    | 33.1<br>(29.1 - 37.1) | 53.6<br>(32.8 - 74.5) | 66.9<br>(57 - 76.7)   |
| Emotional functioning      | 62.6<br>(41.2 - 84)   | 61.1<br>(57.9 - 64.3) | 71.1(67 - 75.2)       | 79.3(75.3 - 83.2)     | 66.3(59.8 - 72.7)     | 66.2<br>(57.2 - 75.2) | 71.2<br>(66.9 - 75.5) | 49.3<br>(43 - 55.6)   | 56.8<br>(51.4 - 62.2) | 60.9<br>(53 - 68.8)   |
| Cognitive functioning      | 81.1<br>(73.2 - 89)   | 69.7<br>(66.7 - 72.6) | 85.6(81.8 - 89.4)     | 86.4(84.7 - 88)       | 82.9(78.8 - 87)       | 75.3<br>(60.9 - 89.8) | 79.5<br>(76.4 - 82.6) | 33.8<br>(30 - 37.6)   | 74.8<br>(64.3 - 85.3) | 69.4<br>(61 - 77.8)   |
| Social functioning         | 76.5<br>(61.9 - 91.1) | 85.3<br>(82.9 - 87.7) | 86.5(82.9 - 90)       | 84.4(76.3 - 92.5)     | 51.3(46.8 - 55.7)     | 75.9<br>(63.1 - 88.7) | 85.8<br>(82.1 - 89.5) | 59.9<br>(51.4 - 68.4) | 82.5<br>(79.6 - 85.5) | 77.5<br>(69.1 - 85.9) |
| <b>Symptom scales</b>      |                       |                       |                       |                       |                       |                       |                       |                       |                       |                       |
| Fatigue                    | 30.3<br>(20.5 - 40)   | 37.4<br>(22 - 52.9)   | 19.3<br>(16.1 - 22.4) | 21.8<br>(19.8 - 23.8) | 31.4<br>(28.5 - 34.3) | 24.3<br>(21.6 - 26.9) | NR                    | 50.3<br>(43.1 - 57.5) | 33.3<br>(31.5 - 35.1) | 43.6<br>(35.1 - 52)   |
| Nausea and vomiting        | 13.8<br>(0 - 31.7)    | 38.1<br>(27.3 - 48.9) | 13.11<br>(0 - 37.26)  | 19.2<br>(17.3 - 21.2) | 14.2<br>(9 - 19.3)    | 12.8<br>(8.3 - 17.3)  | NR                    | 40.8<br>(34.9 - 46.7) | 0(0 - 2.1)            | 30.2<br>(21.9 - 38.4) |
| Pain                       | 18.5<br>(13.9 - 23.1) | 34.3<br>(20.5 - 48)   | 20.8<br>(16.1 - 22.4) | 9.1<br>(6.4 - 11.9)   | 26.3<br>(20.4 - 32.1) | 24<br>(20.2 - 27.9)   | NR                    | 45.1<br>(41.1 - 49.1) | 41.7<br>(25.3 - 58)   | 29.4<br>(21 - 37.9)   |
| Dyspnoea                   | 10.1<br>(8 - 12.3)    | 35.1<br>(17.9 - 52.3) | 4.8<br>(0 - 11.6)     | 11.2<br>(7.4 - 15)    | 4.2<br>(0.7 - 7.6)    | 11.1<br>(9.6 - 12.5)  | NR                    | 47<br>(40.8 - 53.2)   | NR                    | 22.5<br>(13.8 - 31.3) |
| Insomnia                   | 21.8<br>(14.8 - 28.8) | 41.1<br>(28.6 - 53.6) | 26.1<br>(15.8 - 36.5) | 26<br>(20 - 32)       | 30<br>(23.1 - 36.9)   | 25.9<br>(23 - 28.9)   | NR                    | 60.5<br>(51.7 - 69.3) | 33.3<br>(30.4 - 36.2) | 42.8<br>(32.3 - 53.2) |
| Appetite loss              | 8.8<br>(1.9 - 15.8)   | 37.3<br>(20.6 - 54.1) | 9.4<br>(5.8 - 13)     | 12.2<br>(10.1 - 14.3) | 27.5<br>(20.5 - 34.5) | 12.7<br>(11.5 - 13.9) | NR                    | 44.7<br>(39.9 - 49.5) | 16.6<br>(0 - 49.2)    | 24.3<br>(14.2 - 34.4) |
| Constipation               | 11.4<br>(0.7 - 22.1)  | 35.6<br>(15.8 - 55.4) | 17.8<br>(12.9 - 22.6) | 17<br>(14.8 - 19.3)   | 12.5<br>(7.4 - 17.6)  | 16.6<br>(14.6 - 18.5) | NR                    | 35.5<br>(31.5 - 39.5) | NR                    | 29.8<br>(19.9 - 39.6) |
| Diarrhoea                  | 5.6<br>(3.7 - 7.6)    | 35.7<br>(13.5 - 57.8) | 2<br>(0.5 - 3.6)      | 9.4<br>(4.2 - 14.6)   | 11.7<br>(6.4 - 16.9)  | 7<br>(5.3 - 8.6)      | NR                    | 34.9<br>(31 - 38.8)   | NR                    | 18.7<br>(10.5 - 26.9) |
| Financial difficulties     | 15.5<br>(7.8 - 23.2)  | 44.3<br>(12.2 - 76.4) | 18.7<br>(6.4 - 31)    | 16.1<br>(22.7 - 11.5) | 27.5<br>(22.3 - 32.7) | 31.7<br>(26.4 - 37)   | 76.7<br>(71.4 - 82)   | 55.3<br>(45 - 65.6)   | 16.6<br>(0 - 49.2)    | 42.8<br>(32.4 - 53.2) |

QLQ-B23

| Table C. Meta-analysis of HRQoL by EORTC QLQ-B23 broken down by country and stage. |                       |                       |                       |                       |                       |                       |                       |                       |                       |
|------------------------------------------------------------------------------------|-----------------------|-----------------------|-----------------------|-----------------------|-----------------------|-----------------------|-----------------------|-----------------------|-----------------------|
| Stage                                                                              | I-II and III          |                       |                       |                       |                       |                       |                       | IV                    |                       |
| Country                                                                            | Argentina             | Brazil                | Chile                 | Colombia              | Mexico                | Paraguay              | Peru                  | Brazil                | Mexico                |
| Studies                                                                            | 2                     | 12                    | 1                     | 1                     | 5                     | 1                     | 1                     | 2                     | 1                     |
| N                                                                                  | 271                   | 2037                  | 91                    | 362                   | 782                   | 125                   | 38                    | 248                   | 47                    |
| Body image                                                                         | 69.1<br>(50.6 - 87.6) | 76.6<br>(66.3 - 87)   | 80.5<br>(75.2 - 85.8) | 85.3<br>(83 - 87.6)   | 66.6<br>(43.4 - 89.9) | 75.8<br>(70.7 - 80.9) | 44.1<br>(42.4 - 45.8) | 82.5<br>(73.2 - 91.8) | 81.5<br>(59.8 - 100)  |
| Sexual enjoyment                                                                   | 60.9<br>(57.3 - 64.5) | 50.9<br>(40.8 - 61.1) | 17.3<br>(14.2 - 20.4) | 85.4<br>(82.5 - 88.3) | 34.3<br>(21.9 - 46.7) | 18.2<br>(12.8 - 23.6) | NR                    | 54.6<br>(40.3 - 68.8) | 21.6<br>(14.9 - 28.3) |
| Sexual functioning                                                                 | 42.9<br>(22.7 - 63.1) | 47.4<br>(32.4 - 62.4) | 56.4<br>(49.2 - 63.6) | 84.6<br>(82.3 - 86.9) | 35.6<br>(19 - 52.2)   | 14.5<br>(10.6 - 18.4) | 24.1<br>(22.5 - 25.7) | 58.9<br>(31.9 - 85.9) | 11.5<br>(6.3 - 16.6)  |
| Future perspective                                                                 | 46.1<br>(11.7 - 80.6) | 53.7<br>(44 - 63.4)   | 16.9<br>(13.3 - 20.5) | 59.6<br>(56.7 - 62.5) | 53.8<br>(37.5 - 70.2) | 51.5<br>(46.2 - 56.8) | NR                    | 29.1<br>(4.6 - 53.6)  | 44.4<br>(33.5 - 55.3) |
| Arm symptoms                                                                       | 22.9<br>(14.3 - 31.4) | 33.4<br>(26.6 - 40.2) | 18.6<br>(14.7 - 22.5) | 21.7<br>(19 - 24.4)   | 27.7<br>(13.8 - 41.6) | 80.8<br>(77 - 84.6)   | NR                    | 22.2<br>(20.6 - 23.8) | 23.2<br>(17 - 29.5)   |
| Breast symptoms                                                                    | 12.9<br>(9.1 - 16.7)  | 37.2<br>(23.9 - 50.5) | 18.8<br>(13.6 - 24)   | 15.4<br>(13.5 - 17.3) | 27.2<br>(10.4 - 43.9) | 81.9<br>(79.1 - 84.7) | 36.2<br>(33.2 - 39.2) | 16.7<br>(15.4 - 18)   | 21.8<br>(14 - 29.5)   |
| Systemic therapy side effects                                                      | 28.1<br>(8.7 - 47.5)  | 39.4<br>(27.8 - 51)   | 18.1<br>(13.9 - 22.3) | 25.7<br>(23.9 - 27.5) | 27.7<br>(21.8 - 33.7) | 75.7<br>(72.3 - 79.1) | NR                    | 25<br>(23.6 - 26.4)   | 30.6<br>(24.3 - 36.8) |
| Upset by hair loss                                                                 | 28.3<br>(21 - 35.6)   | 63<br>(49.5 - 76.4)   | 42<br>(36.4 - 47.6)   | 19.9<br>(16.9 - 22.9) | 36.8<br>(15.6 - 58)   | 69.9<br>(63.8 - 76)   | NR                    | NR                    | 29.3<br>(20.9 - 37.7) |

FACT-B

| Table D. Meta-analysis of HRQoL by FACT-B broken down by country and stage. |                      |        |        |          |           |          |
|-----------------------------------------------------------------------------|----------------------|--------|--------|----------|-----------|----------|
| Country                                                                     | Stage I – II and III |        |        |          | Stage IV  |          |
|                                                                             | Argentina            | Brazil | Mexico | Colombia | Argentina | Colombia |

| <b>Studies</b>                  | <b>1</b>              | <b>6</b>                | <b>1</b>              | <b>2</b>                | <b>1</b>             | <b>1</b>              |
|---------------------------------|-----------------------|-------------------------|-----------------------|-------------------------|----------------------|-----------------------|
| <b>N</b>                        | <b>156</b>            | <b>591</b>              | <b>142</b>            | <b>237</b>              | <b>20</b>            | <b>4</b>              |
| <b>Physical well-being</b>      | 17<br>(16.5 - 17.6)   | 21.5<br>(20.4 - 22.7)   | 22.9<br>(22.2 - 23.6) | 20.9<br>(20.1 - 21.7)   | 11.2<br>(8.4 - 14.1) | 20.0<br>(12.6 - 27.3) |
| <b>Social/family well-being</b> | 24.7<br>(23.9 - 25.5) | 19.8<br>(18.6 - 20.9)   | 20.5<br>(19.6 - 21.4) | 20.3<br>(18.1 - 22.5)   | 8.7<br>(6.0 - 11.5)  | 21<br>(11.4 - 30.6)   |
| <b>Emotional well-being</b>     | 7.1<br>(6.5 - 7.7)    | 18.3<br>(17.4 - 19.2)   | 15.7<br>(14.8 - 16.5) | 18.9<br>(17.5 - 20.3)   | 10<br>(7.8 - 12.2)   | 14.5<br>(5.4 - 23.6)  |
| <b>Functional well-being</b>    | 25.7<br>(25.1 - 26.3) | 18.3<br>(17.7 - 19)     | 18.1<br>(17.2 - 19)   | 19.7<br>(16.5 - 22.9)   | 12.5<br>(9.5 - 15.5) | 16.7<br>(3.9 - 29.4)  |
| <b>Breast cancer subscale</b>   | 14.2<br>(13.6 - 14.8) | 23.4<br>(22.4 - 24.5)   | 23.1<br>(22.2 - 24)   | 25.2<br>(24.3 - 26)     | NR                   | 23.7<br>(13.1 - 34.3) |
| <b>TOI</b>                      | 40<br>(39.1 - 40.8)   | 65.9<br>(63.6 - 68.3)   | 64.4<br>(62.3 - 66.4) | NR                      | NR                   | NR                    |
| <b>FACT-G</b>                   | 59.9<br>(58.9 - 60.9) | 78.8<br>(77.4 - 80.2)   | 77.7<br>(75.5 - 79.9) | NR                      | NR                   | NR                    |
| <b>FACT-B total score</b>       | 74.1<br>(72.9 - 75.4) | 102.1<br>(98.3 - 105.8) | 101.1<br>(98.2 - 104) | 105.7<br>(93.1 - 118.3) | NR                   | 96<br>(63.6 - 128.4)  |

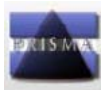

# PRISMA 2009 Checklist

| Section/topic             | #  | Checklist item                                                                                                                                                                                                                                                                                              | Reported on page # |
|---------------------------|----|-------------------------------------------------------------------------------------------------------------------------------------------------------------------------------------------------------------------------------------------------------------------------------------------------------------|--------------------|
| <b>TITLE</b>              |    |                                                                                                                                                                                                                                                                                                             |                    |
| Title                     | 1  | Identify the report as a systematic review, meta-analysis, or both.                                                                                                                                                                                                                                         | 1                  |
| <b>ABSTRACT</b>           |    |                                                                                                                                                                                                                                                                                                             |                    |
| Structured summary        | 2  | Provide a structured summary including, as applicable: background; objectives; data sources; study eligibility criteria, participants, and interventions; study appraisal and synthesis methods; results; limitations; conclusions and implications of key findings; systematic review registration number. | 2                  |
| <b>INTRODUCTION</b>       |    |                                                                                                                                                                                                                                                                                                             |                    |
| Rationale                 | 3  | Describe the rationale for the review in the context of what is already known.                                                                                                                                                                                                                              | 3,4                |
| Objectives                | 4  | Provide an explicit statement of questions being addressed with reference to participants, interventions, comparisons, outcomes, and study design (PICOS).                                                                                                                                                  | 4                  |
| <b>METHODS</b>            |    |                                                                                                                                                                                                                                                                                                             |                    |
| Protocol and registration | 5  | Indicate if a review protocol exists, if and where it can be accessed (e.g., Web address), and, if available, provide registration information including registration number.                                                                                                                               | 5                  |
| Eligibility criteria      | 6  | Specify study characteristics (e.g., PICOS, length of follow-up) and report characteristics (e.g., years considered, language, publication status) used as criteria for eligibility, giving rationale.                                                                                                      | 5                  |
| Information sources       | 7  | Describe all information sources (e.g., databases with dates of coverage, contact with study authors to identify additional studies) in the search and date last searched.                                                                                                                                  | 5                  |
| Search                    | 8  | Present full electronic search strategy for at least one database, including any limits used, such that it could be repeated.                                                                                                                                                                               | S1                 |
| Study selection           | 9  | State the process for selecting studies (i.e., screening, eligibility, included in systematic review, and, if applicable, included in the meta-analysis).                                                                                                                                                   | 5,6                |
| Data collection process   | 10 | Describe method of data extraction from reports (e.g., piloted forms, independently, in duplicate) and any processes for obtaining and confirming data from investigators.                                                                                                                                  | 5,6,7              |
| Data items                | 11 | List and define all variables for which data were sought (e.g., PICOS, funding sources) and any assumptions and simplifications made.                                                                                                                                                                       | 6,7                |

|                                    |    |                                                                                                                                                                                                                        |       |
|------------------------------------|----|------------------------------------------------------------------------------------------------------------------------------------------------------------------------------------------------------------------------|-------|
| Risk of bias in individual studies | 12 | Describe methods used for assessing risk of bias of individual studies (including specification of whether this was done at the study or outcome level), and how this information is to be used in any data synthesis. | 6, S2 |
| Summary measures                   | 13 | State the principal summary measures (e.g., risk ratio, difference in means).                                                                                                                                          | 14-21 |
| Synthesis of results               | 14 | Describe the methods of handling data and combining results of studies, if done, including measures of consistency (e.g., $I^2$ ) for each meta-analysis.                                                              | 5,6,7 |

| Section/topic                 | #  | Checklist item                                                                                                                                                                                           | Reported on page # |
|-------------------------------|----|----------------------------------------------------------------------------------------------------------------------------------------------------------------------------------------------------------|--------------------|
| Risk of bias across studies   | 15 | Specify any assessment of risk of bias that may affect the cumulative evidence (e.g., publication bias, selective reporting within studies).                                                             | 7                  |
| Additional analyses           | 16 | Describe methods of additional analyses (e.g., sensitivity or subgroup analyses, meta-regression), if done, indicating which were pre-specified.                                                         | 6,7                |
| <b>RESULTS</b>                |    |                                                                                                                                                                                                          |                    |
| Study selection               | 17 | Give numbers of studies screened, assessed for eligibility, and included in the review, with reasons for exclusions at each stage, ideally with a flow diagram.                                          | 8                  |
| Study characteristics         | 18 | For each study, present characteristics for which data were extracted (e.g., study size, PICOS, follow-up period) and provide the citations.                                                             | 8 - 12             |
| Risk of bias within studies   | 19 | Present data on risk of bias of each study and, if available, any outcome level assessment (see item 12).                                                                                                | 8                  |
| Results of individual studies | 20 | For all outcomes considered (benefits or harms), present, for each study: (a) simple summary data for each intervention group (b) effect estimates and confidence intervals, ideally with a forest plot. | 13-20              |
| Synthesis of results          | 21 | Present results of each meta-analysis done, including confidence intervals and measures of consistency.                                                                                                  | 14-21              |
| Risk of bias across studies   | 22 | Present results of any assessment of risk of bias across studies (see Item 15).                                                                                                                          | 13                 |
| Additional analysis           | 23 | Give results of additional analyses, if done (e.g., sensitivity or subgroup analyses, meta-regression [see Item 16]).                                                                                    | 14-21              |
| <b>DISCUSSION</b>             |    |                                                                                                                                                                                                          |                    |
| Summary of evidence           | 24 | Summarize the main findings including the strength of evidence for each main outcome; consider their relevance to key groups (e.g., healthcare providers, users, and policy makers).                     | 21,22              |
| Limitations                   | 25 | Discuss limitations at study and outcome level (e.g., risk of bias), and at review-level (e.g., incomplete retrieval of identified research, reporting bias).                                            | 24,25              |

|                |    |                                                                                                                                            |    |
|----------------|----|--------------------------------------------------------------------------------------------------------------------------------------------|----|
| Conclusions    | 26 | Provide a general interpretation of the results in the context of other evidence, and implications for future research.                    | 26 |
| <b>FUNDING</b> |    |                                                                                                                                            |    |
| Funding        | 27 | Describe sources of funding for the systematic review and other support (e.g., supply of data); role of funders for the systematic review. | 1  |

*From:* Moher D, Liberati A, Tetzlaff J, Altman DG, The PRISMA Group (2009). Preferred Reporting Items for Systematic Reviews and Meta-Analyses: The PRISMA Statement. PLoS Med 6(7): e1000097. doi:10.1371/journal.pmed1000097

For more information, visit: [www.prisma-statement.org](http://www.prisma-statement.org).
